# Supplementary material for: Two WV–MnIIIbimetallic assemblies built by octacyanotungstate(v) and MnIIISchiff bases: molecular structures and a spin-flop transition
Source: Royal Society of Chemistry journal article supplement (doi:10.1039/b701704a), 2007-01-01
Supplement: b701704a.pdf [file b701704a.pdf]

**Two  $W^V$ - $Mn^{III}$  Bimetallic Assemblies Built by Octacyanotungstate(V) and  $Mn^{III}$ -Schiff bases: Molecular Structures and a Spin-Flop Transition**

Hyun Hee Ko,<sup>a</sup> Jeong Hak Lim,<sup>a</sup> Hounng Sik Yoo,<sup>a</sup> Jun Sung Kang,<sup>b</sup> Hyoung Chan Kim,<sup>c</sup> Eui Kwan Koh,<sup>b</sup> and Chang Seop Hong\*<sup>a</sup>

Department of Chemistry and Center for Electro- and Photo-Responsive Molecules, Korea University, Seoul 136-701, Korea, Nano-Bio System Research Team, Korea Basic Science Institute, Seoul 136-713, Korea, and Systems Research Team, Research & Development Division, Nuclear Fusion Research Center, Daejeon 305-333, Korea

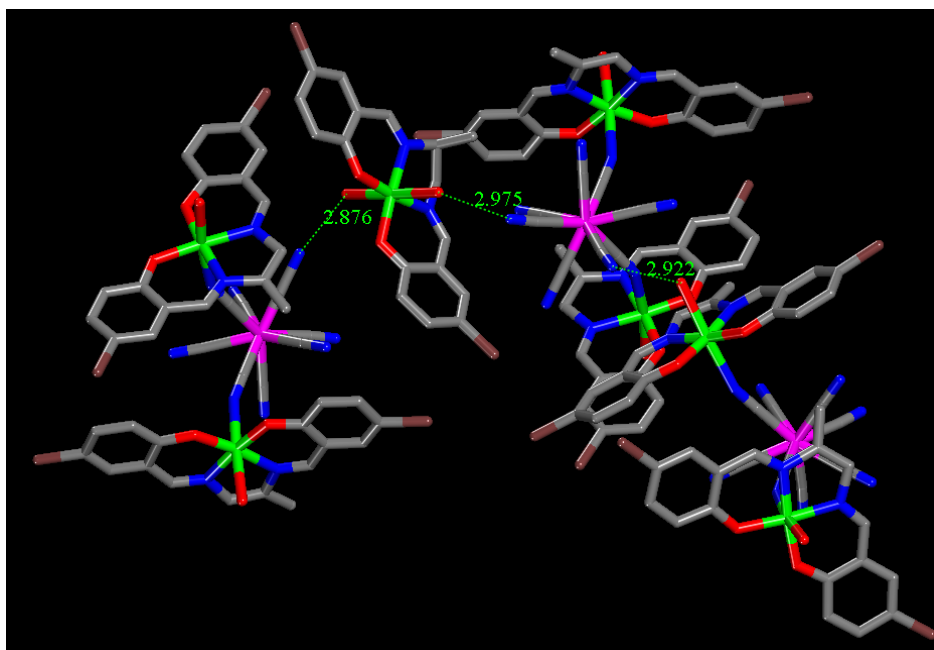

**Figure S1.** Extended structure of **1** showing hydrogen bonds among  $[\text{W}(\text{CN})_8]^{3-}$  and isolated  $[\text{Mn}(\text{Cl-salmen})(\text{H}_2\text{O})_2]^+$  units.

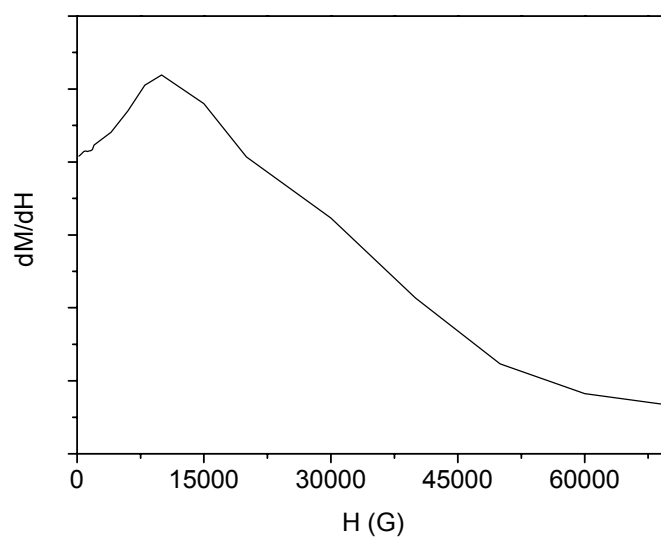

Figure S2. Derivative of M against H showing a maximum around 1.2 T.

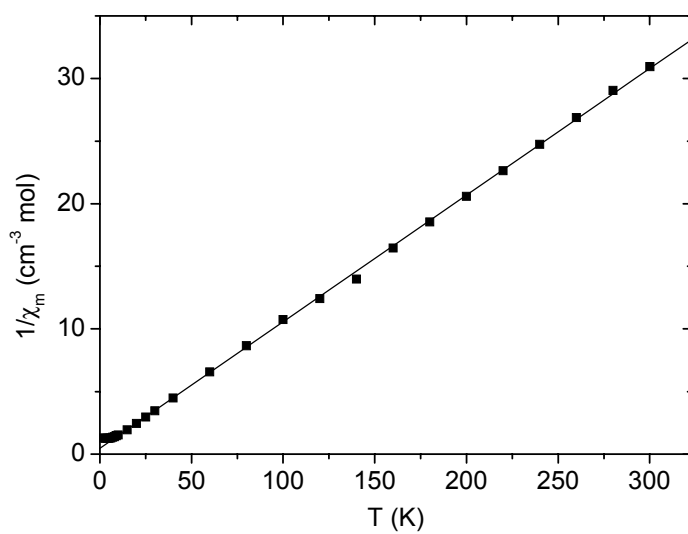

Figure S3. Plot of  $\chi_m^{-1}$  versus T for **2**. The solid line gives the Curie-Weiss fitting.
